# Supplementary material for: Fundamental studies of laser ablation ICPMS using a nitrogen plasma source and helium, argon and nitrogen as carrier gas
Source: Royal Society of Chemistry journal article supplement (doi:10.1039/d4ja00327f), 2024-01-01
Supplement: d4ja00327f10.pdf [file d4ja00327f10.pdf]

## Fundamental Studies of Laser Ablation ICPMS using a Nitrogen Plasma Source and Helium, Argon and Nitrogen as Carrier Gas

Dylan Käser<sup>a</sup>, Ralf Kägi<sup>b</sup>, Bodo Hattendorf<sup>a</sup>, Detlef Günther<sup>a</sup>,

<sup>a</sup> Laboratory of Inorganic Chemistry, Department of Chemistry and Applied Biosciences, ETH Zürich, Vladimir-Prelog-Weg 1, 8093 Zurich, Switzerland

<sup>b</sup> Eawag, Department of Process Engineering, Überlandstrasse 133, 8600 Dübendorf, Switzerland

### Supporting information

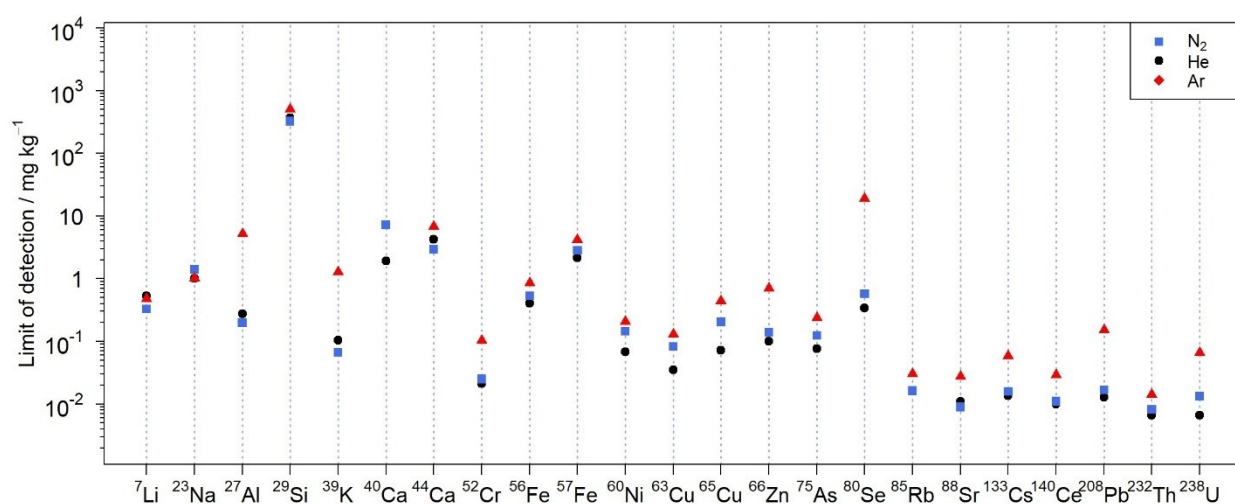

Figure S 1 : LODs obtained with helium (black), nitrogen (blue) or argon (red) as carrier gas using 19 J/cm<sup>2</sup> and a 90 μm spot for LA of NIST SRM 610. These data were calculated according to Longerich et al.<sup>39</sup> from the sensitivities given in Figure 2.

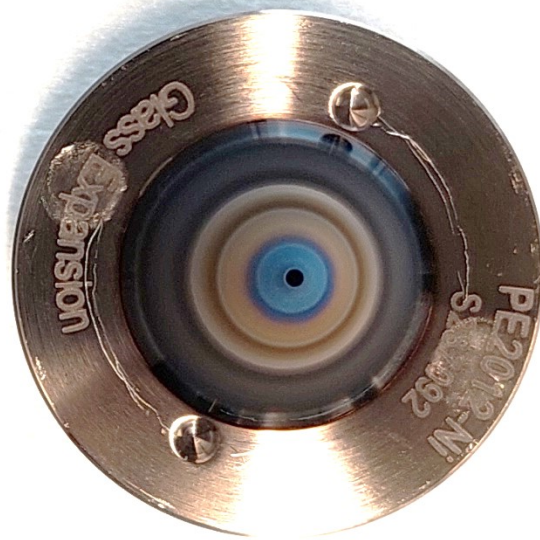

Figure S 2 : Ni-skimmer cone after one day of measurement using only nitrogen. After a second day of measurement using helium, the opening was widened by 10 %.

Table S 1 : Quantification of the USGS GSE-1G basaltic glass reference material using NIST SRM 610 as calibration standard, <sup>40</sup>Ca as internal standard and a fluence of 19 J/cm<sup>2</sup>. The concentrations were expressed in mg/kg for the reference values as well as for the measured concentrations. Standard deviations (SD) indicate the measurement uncertainties for the present study and the reference values. <sup>40</sup>Ca was not measured for measurement using argon as carrier gas due to the high background caused by the <sup>40</sup>Ar<sup>+</sup> ion and <sup>44</sup>Ca was used as internal standard. The deviation of measured concentration is provided for each gas in percent from the reference value. IS: used as internal standard.

| USGS GSE-1G  |           |      |          |      |           |        |      |           |        |      |           |
|--------------|-----------|------|----------|------|-----------|--------|------|-----------|--------|------|-----------|
|              | Reference |      | Nitrogen |      |           | Helium |      |           | Argon  |      |           |
|              | Conc.     | SD   | Conc.    | SD   | Deviation | Conc.  | SD   | Deviation | Conc.  | SD   | Deviation |
| <b>Li7</b>   | 430       | 60   | 482      | 6    | 12        | 452.5  | 1.2  | 5         | 478    | 7    | 11        |
| <b>Na23</b>  | 28935     | 1484 | 30100    | 600  | 4.0       | 30400  | 600  | 5         | 32280  | 150  | 12        |
| <b>Al27</b>  | 68824     | 2118 | 77700    | 1200 | 13        | 73700  | 1100 | 7         | 73500  | 1100 | 7         |
| <b>Si29</b>  | 250600    | 7000 | 266900   | 2800 | 6         | 276000 | 4000 | 10        | 253000 | 1600 | 0.9       |
| <b>K39</b>   | 21574     | 830  | 24600    | 400  | 14        | 25300  | 300  | 17        | 24770  | 240  | 15        |
| <b>Ca40</b>  | 52857     | 2143 | IS       |      |           | IS     |      |           | -      |      |           |
| <b>Ca44</b>  | 52857     | 2143 | 51700    | 500  | -2        | 50600  | 100  | -4        | IS     |      |           |
| <b>Cr52</b>  | 400       | 80   | 398      | 8    | -0.4      | 397    | 6    | -0.7      | 372.1  | 1.8  | -7        |
| <b>Fe56</b>  | 98699     | 2331 | 107700   | 1800 | 9         | 103480 | 600  | 5         | 92500  | 1600 | -6        |
| <b>Fe57</b>  | 98699     | 2331 | 105000   | 2500 | 6         | 100195 | 800  | 1.5       | 90300  | 700  | -9        |
| <b>Ni60</b>  | 440       | 30   | 486      | 7    | 11        | 460.8  | 1.8  | 5         | 422    | 9    | -4        |
| <b>Cu63</b>  | 380       | 40   | 426      | 11   | 12        | 399    | 10   | 5         | 363    | 26   | -4        |
| <b>Cu65</b>  | 380       | 40   | 432      | 12   | 14        | 395    | 11   | 4         | 359    | 24   | -6        |
| <b>Zn66</b>  | 460       | 10   | 456      | 6    | -1.0      | 463    | 3    | 0.6       | 411    | 16   | -11       |
| <b>As75</b>  | 260       | 90   | 394      | 12   | 51        | 330    | 60   | 25        | 327    | 14   | 26        |
| <b>Se80</b>  | 20        | 16   | 2.1      | 0.4  | -90       | 4.59   | 0.07 | -77       | < 19   |      |           |
| <b>Rb85</b>  | 356       | 4    | 386      | 8    | 8         | 388    | 5    | 9         | 386    | 3    | 9         |
| <b>Sr88</b>  | 447       | 5    | 468      | 6    | 5         | 458.7  | 2.8  | 2.6       | 462    | 5    | 3         |
| <b>Cs133</b> | 310       | 20   | 316      | 6    | 1.9       | 305    | 4    | -1.7      | 303    | 5    | -2.2      |
| <b>Ce140</b> | 414       | 4    | 439      | 11   | 6         | 421.75 | 0.26 | 1.9       | 416    | 3    | 0.5       |
| <b>Pb208</b> | 378       | 12   | 409      | 12   | 8         | 399    | 9    | 6         | 345    | 10   | -9        |
| <b>Th232</b> | 380       | 20   | 405      | 15   | 6         | 393    | 8    | 3         | 373    | 20   | -1.8      |
| <b>U238</b>  | 420       | 30   | 443      | 10   | 5         | 430    | 4    | 2.4       | 408.2  | 0.3  | -2.8      |

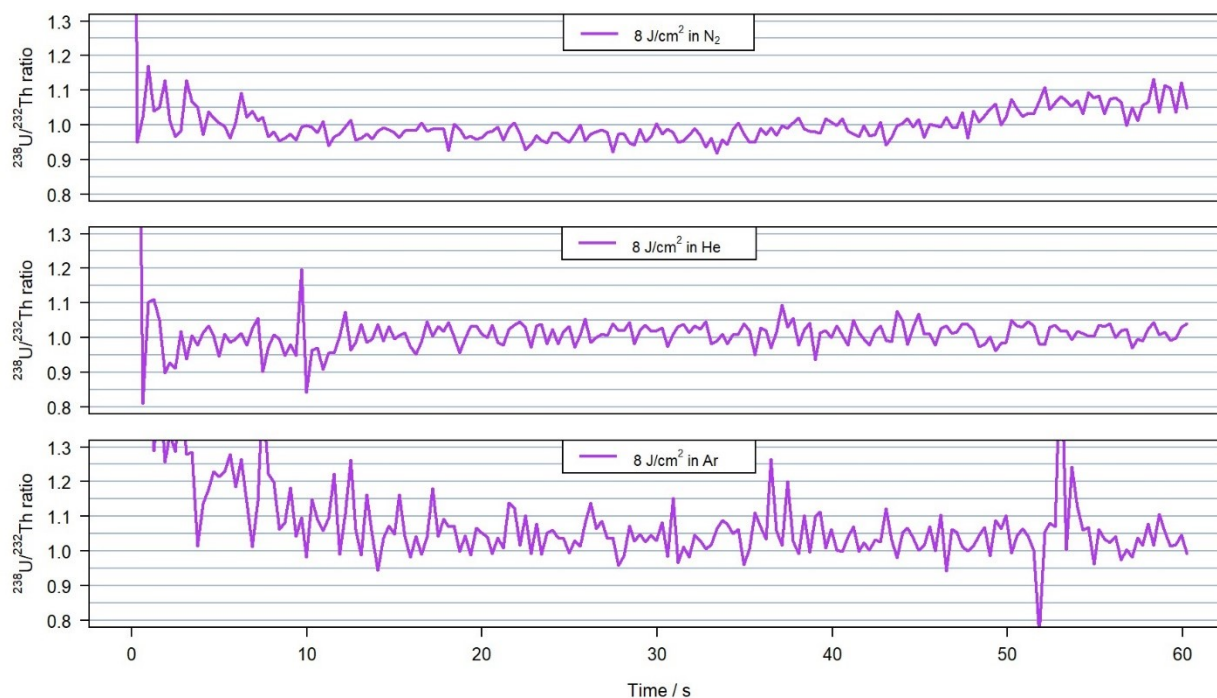

Figure S 3 :  $^{238}\text{U}^+ / ^{232}\text{Th}^+$  ratio measured for 8 J/cm<sup>2</sup> in nitrogen at 1.00(4) on average (top), helium at 1.01(3) (middle) and argon at 1.05(8) (bottom) with 600 pulses at 10 Hz on NIST SRM 610. The time window illustrates the 60 s of ablation without background nor washout time. The  $^{238}\text{U}^+$  transient signal corresponding to the experiment presented here can be visualized in Figure 4 at the corresponding fluence and carrier gas.

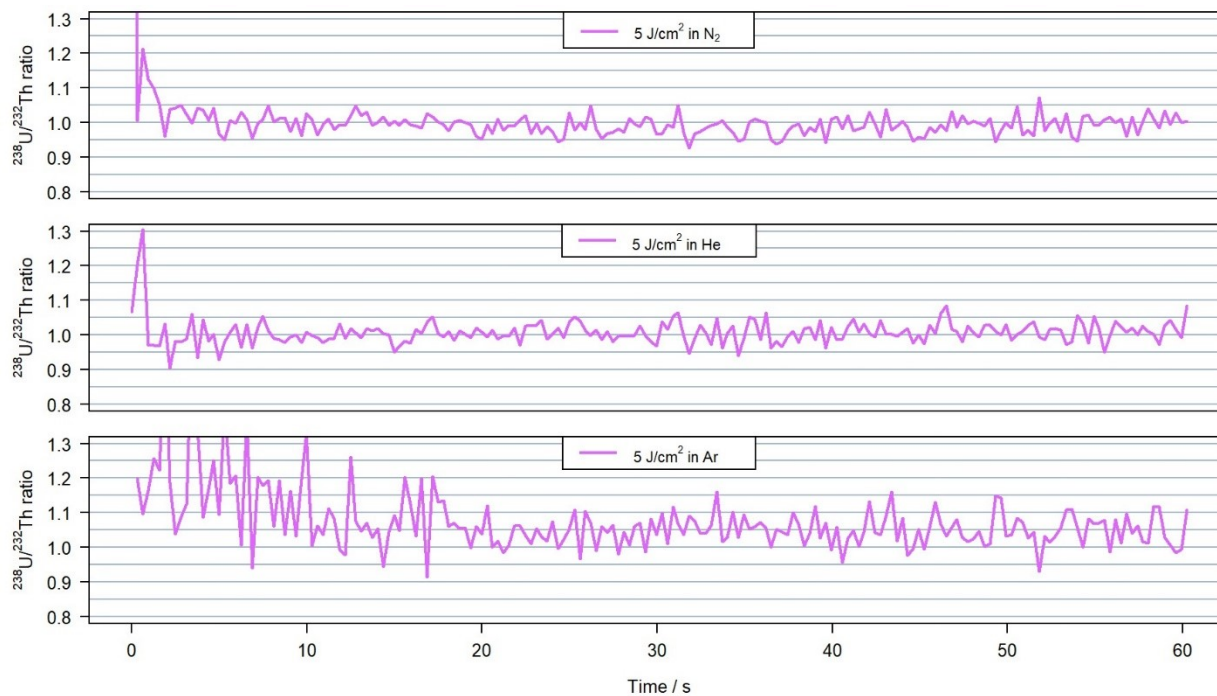

Figure S 4 :  $^{238}\text{U}^+ / ^{232}\text{Th}^+$  ratio measured for 5 J/cm<sup>2</sup> in nitrogen at 0.99(3) on average (top), helium at 1.01(3) (middle) and argon at 1.05(5) (bottom) with 600 pulses at 10 Hz on NIST SRM 610. The time window illustrates the 60 s of ablation without background nor washout time. The  $^{238}\text{U}^+$  transient signal corresponding to the experiment presented here can be visualized in Figure 4 at the corresponding fluence and carrier gas.

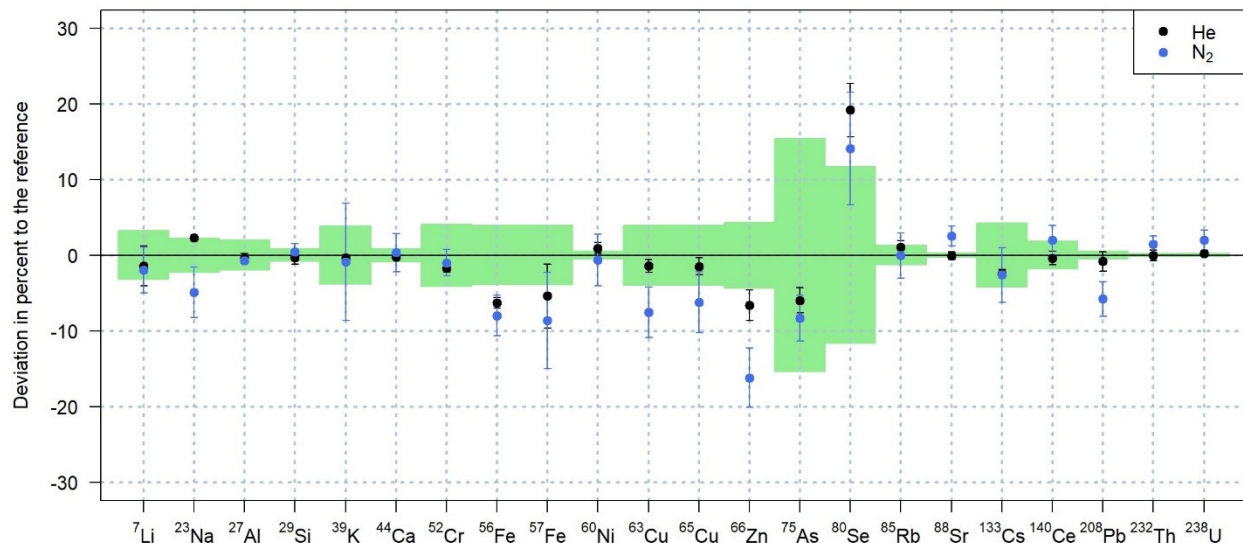

Figure S 5 : Quantification of NIST SRM 612 using nitrogen and helium as carrier gases and NIST SRM 610 as calibration standard.  ${}^{40}\text{Ca}$  was used as internal standard and a fluence of  $18 \text{ J/cm}^2$  was applied in combination with the MPFAC. Error bars represent the standard deviation of 6 replicate analysis, while the standard deviations of the reference values are indicated by the light green areas.

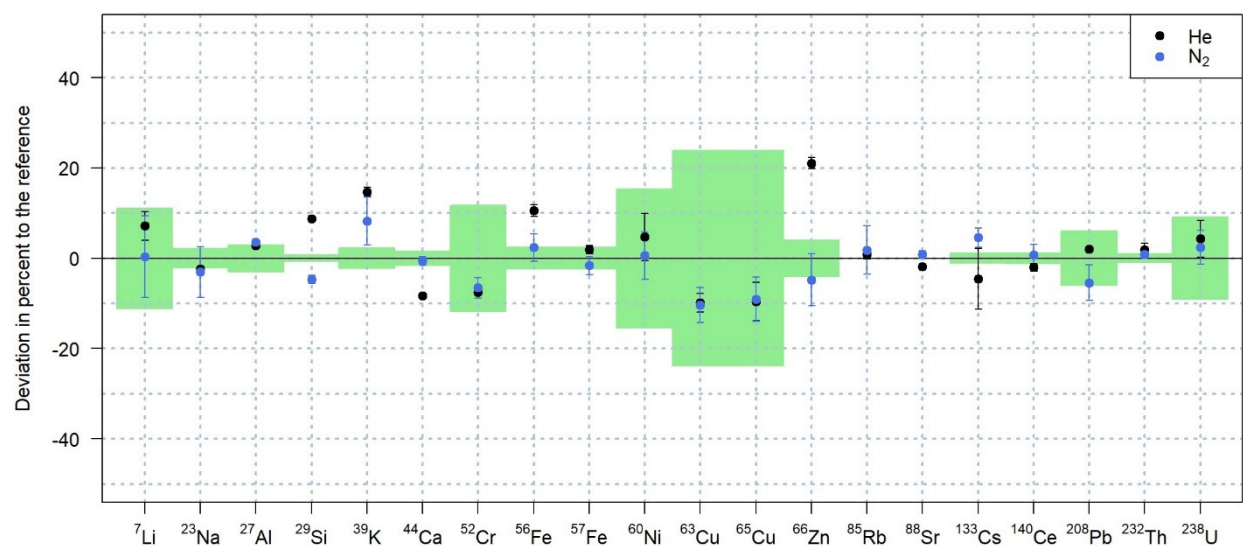

Figure S 6 : Quantification of USGS BCR-2G using nitrogen and helium as carrier gases and NIST SRM 610 as calibration standard.  ${}^{40}\text{Ca}$  was used as internal standard and a fluence of  $18 \text{ J/cm}^2$  was applied in combination with the MPFAC. Error bars represent the standard deviation of 3 replicate analysis, while the standard deviations of the reference values are indicated by the light green areas.

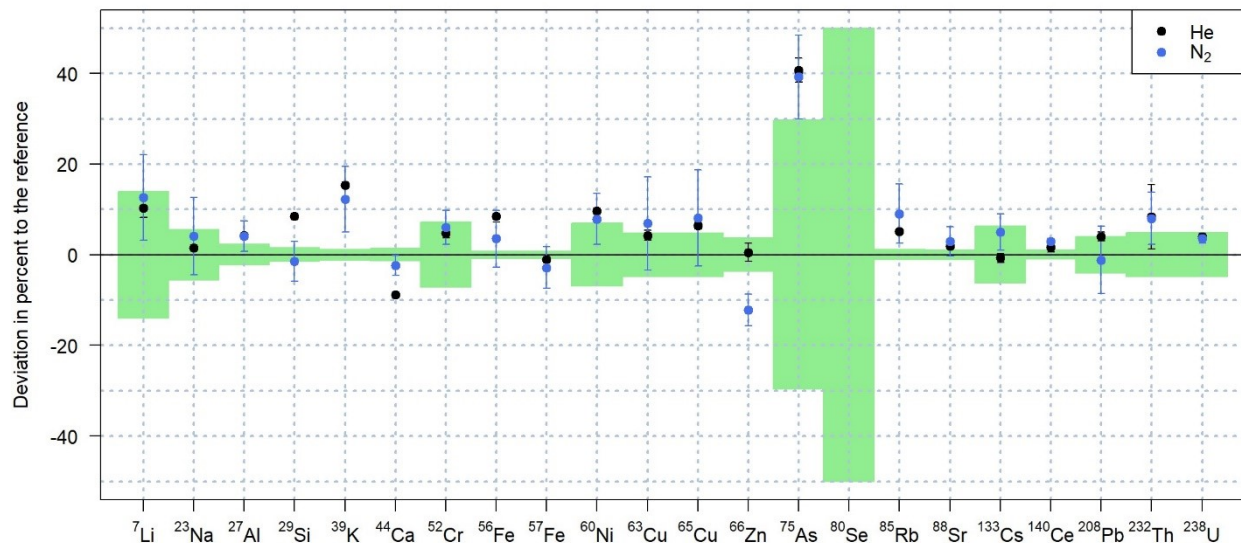

Figure S 7 : Quantification of USGS GSD-1G using nitrogen and helium as carrier gases and NIST SRM 610 as calibration standard.  $^{40}\text{Ca}$  was used as internal standard and a fluence of  $18 \text{ J/cm}^2$  was applied in combination with the MPFAC. Error bars represent the standard deviation of 3 replicate analysis, while the standard deviations of the reference values are indicated by the light green areas.

Table S 2 : Thermodynamic properties of the different carrier gases studied. It should be noted that the isobaric heat capacity was calculated by unit of volume instead of unit of mass by taking into account the density provided in the reference.<sup>42</sup>

| Properties at 300 K and 1 bar                                 | Argon | Helium | Nitrogen |
|---------------------------------------------------------------|-------|--------|----------|
| Isobaric heat capacity $C_p / \text{kJ m}^{-3} \text{K}^{-1}$ | 0.836 | 0.833  | 1.169    |
| Thermal conductivity / $\text{mW m}^{-1} \text{K}^{-1}$       | 17.84 | 156.0  | 25.97    |
| Ionization energy / eV                                        | 15.76 | 24.59  | 15.58    |
| Viscosity / $\mu\text{Pa s}$                                  | 22.74 | 19.93  | 17.89    |

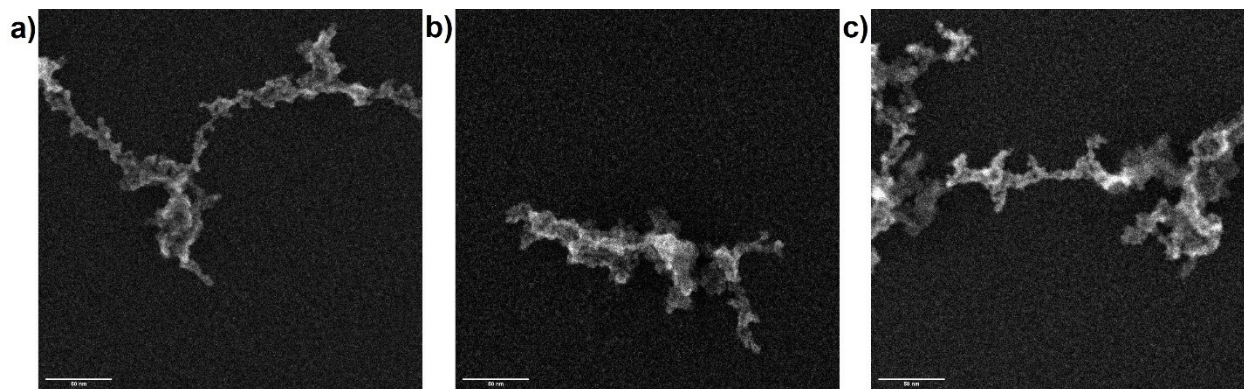

Figure S 8 : STEM images of laser-generated aerosol formed in nitrogen (a), helium (b) and argon (c) in a two-volume cell. The scale bar is 50 nm. The observation of the primary particles with the scale bar set at 50 nm can be compared to Figure 9b), Figure 10b) and Figure 11b), respectively for the same magnification and carrier gas but using the cylindrical ablation cell.
