# Supplementary figures and images for: Fundamental studies of laser ablation ICPMS using a nitrogen plasma source and helium, argon and nitrogen as carrier gas
Source: Royal Society of Chemistry journal article supplement (doi:10.1039/d4ja00327f), 2024-01-01

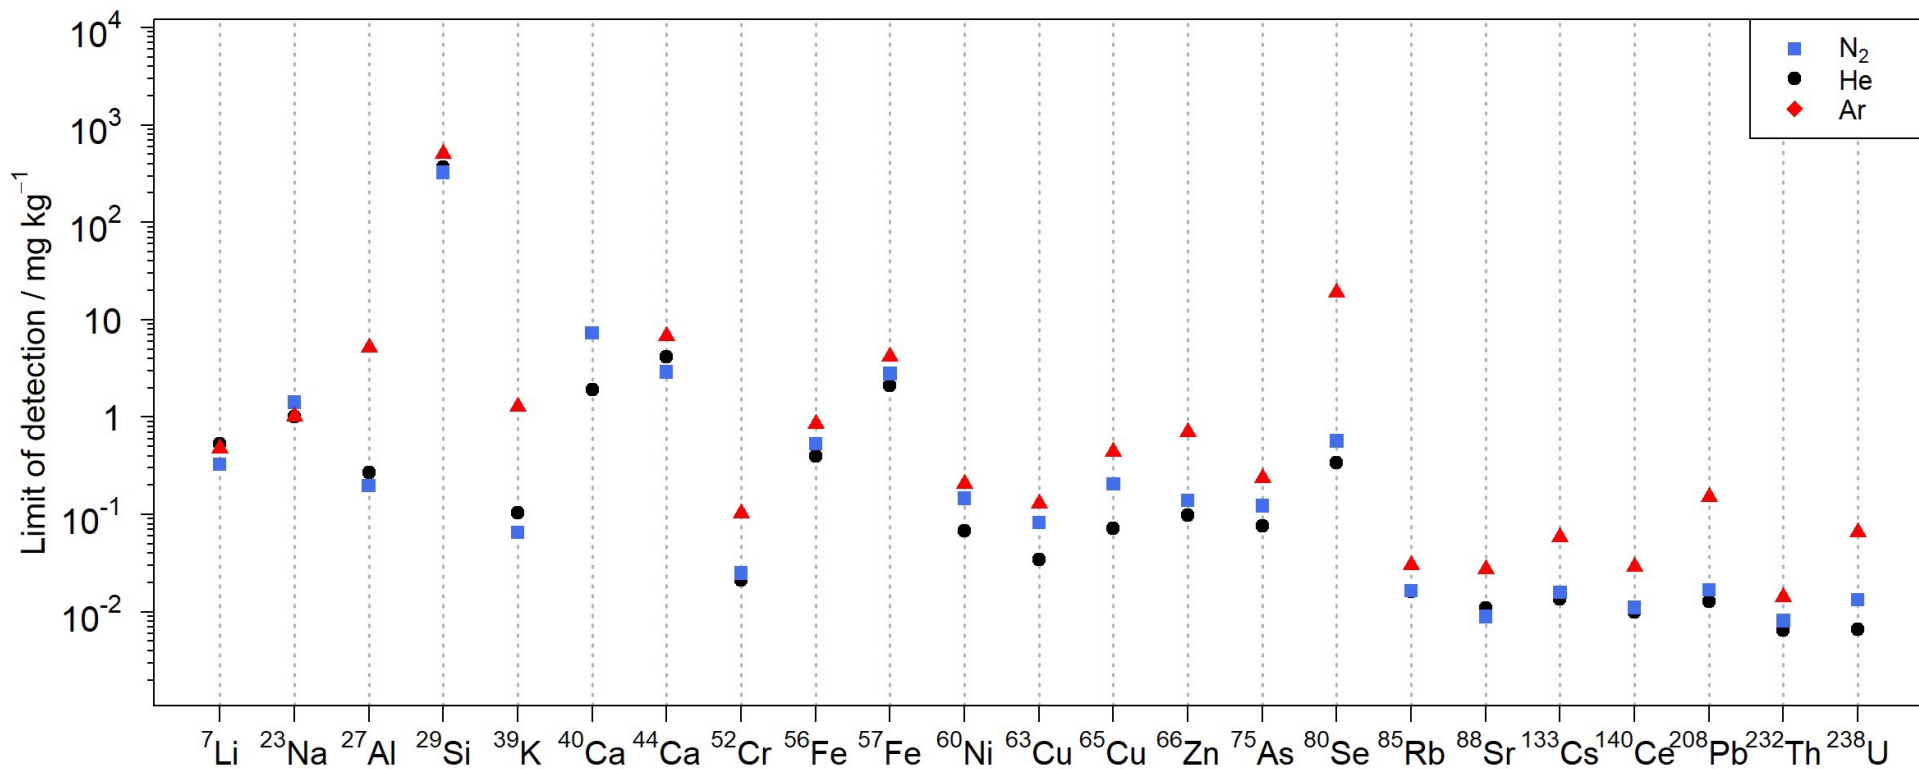

Supplement: d4ja00327f2.pdf [file d4ja00327f2.pdf]

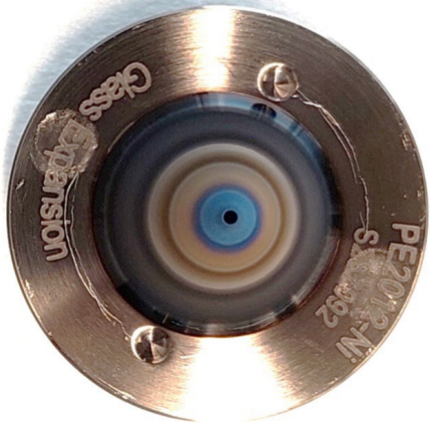

Supplement: d4ja00327f3.pdf [file d4ja00327f3.pdf]

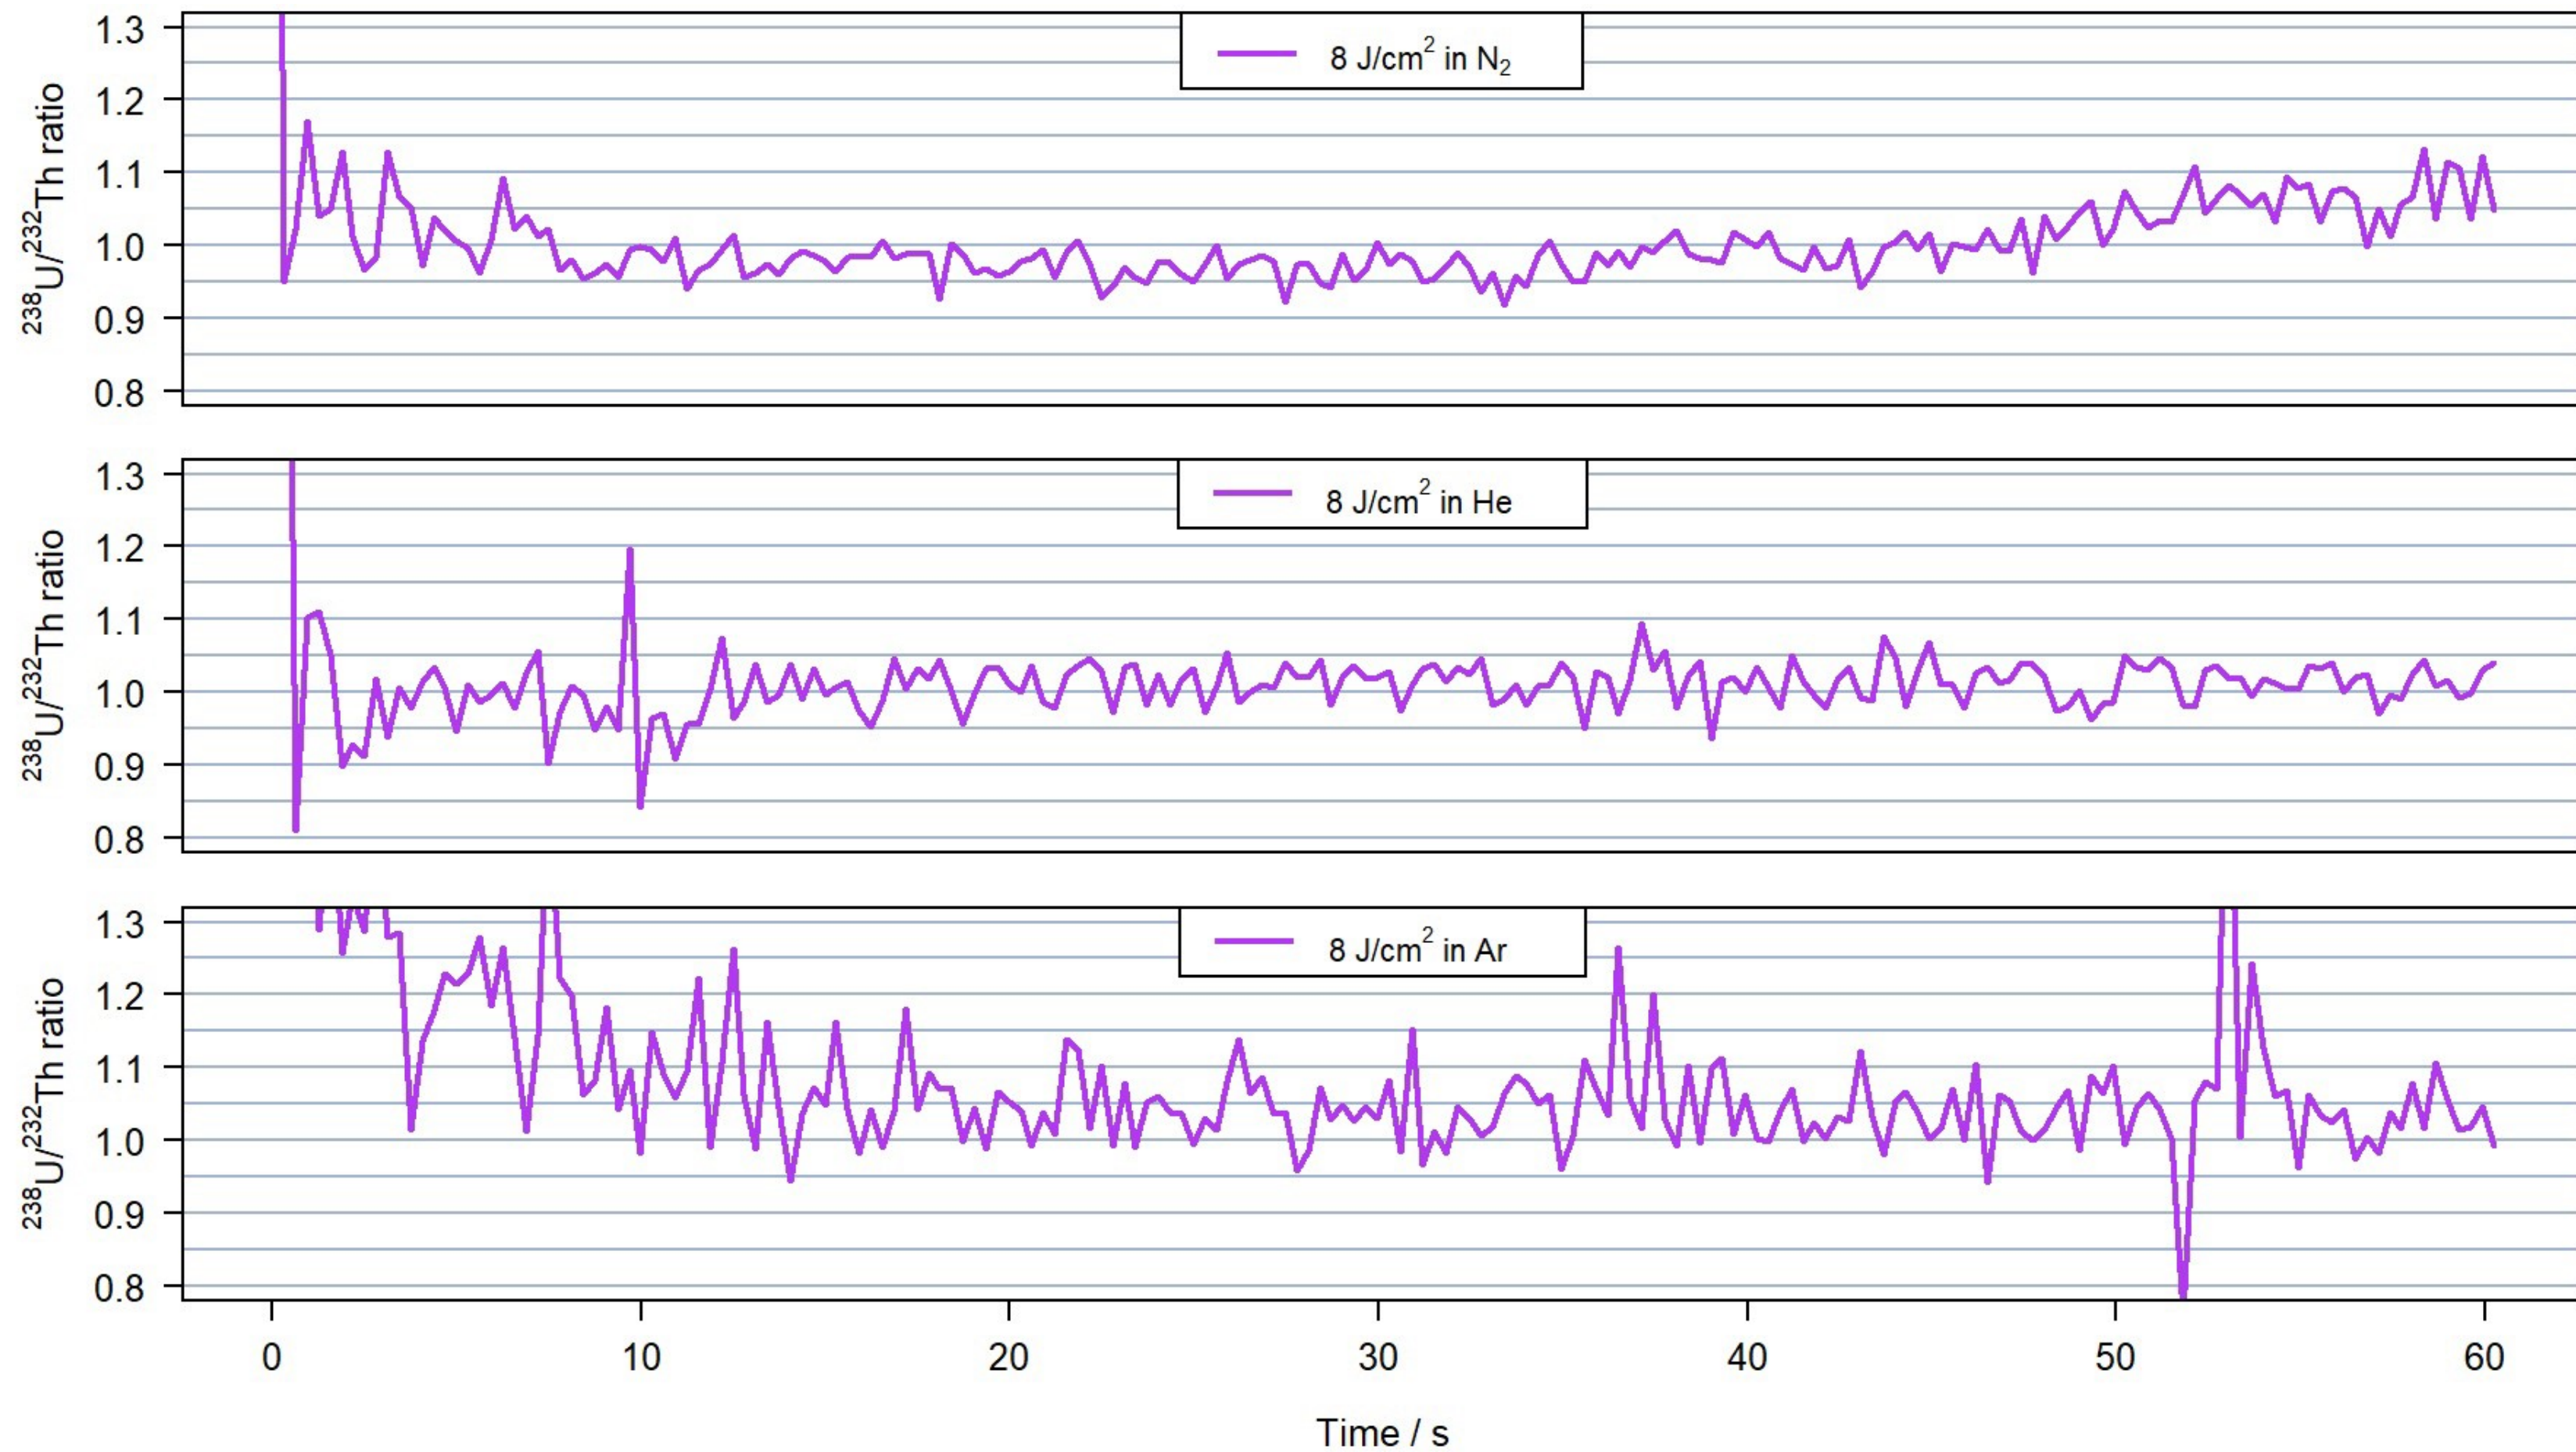

Supplement: d4ja00327f4.pdf [file d4ja00327f4.pdf]

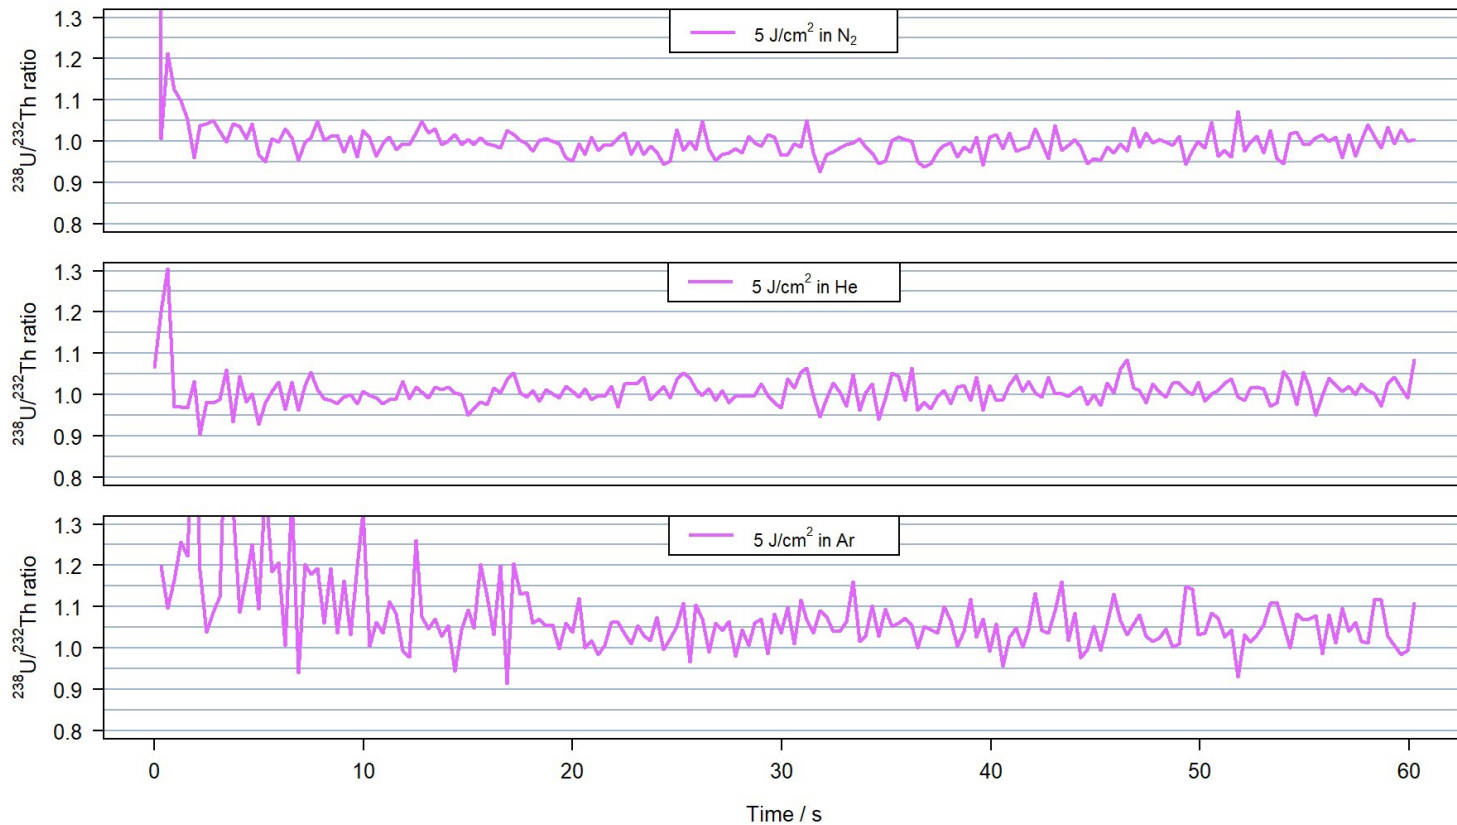

Supplement: d4ja00327f5.pdf [file d4ja00327f5.pdf]

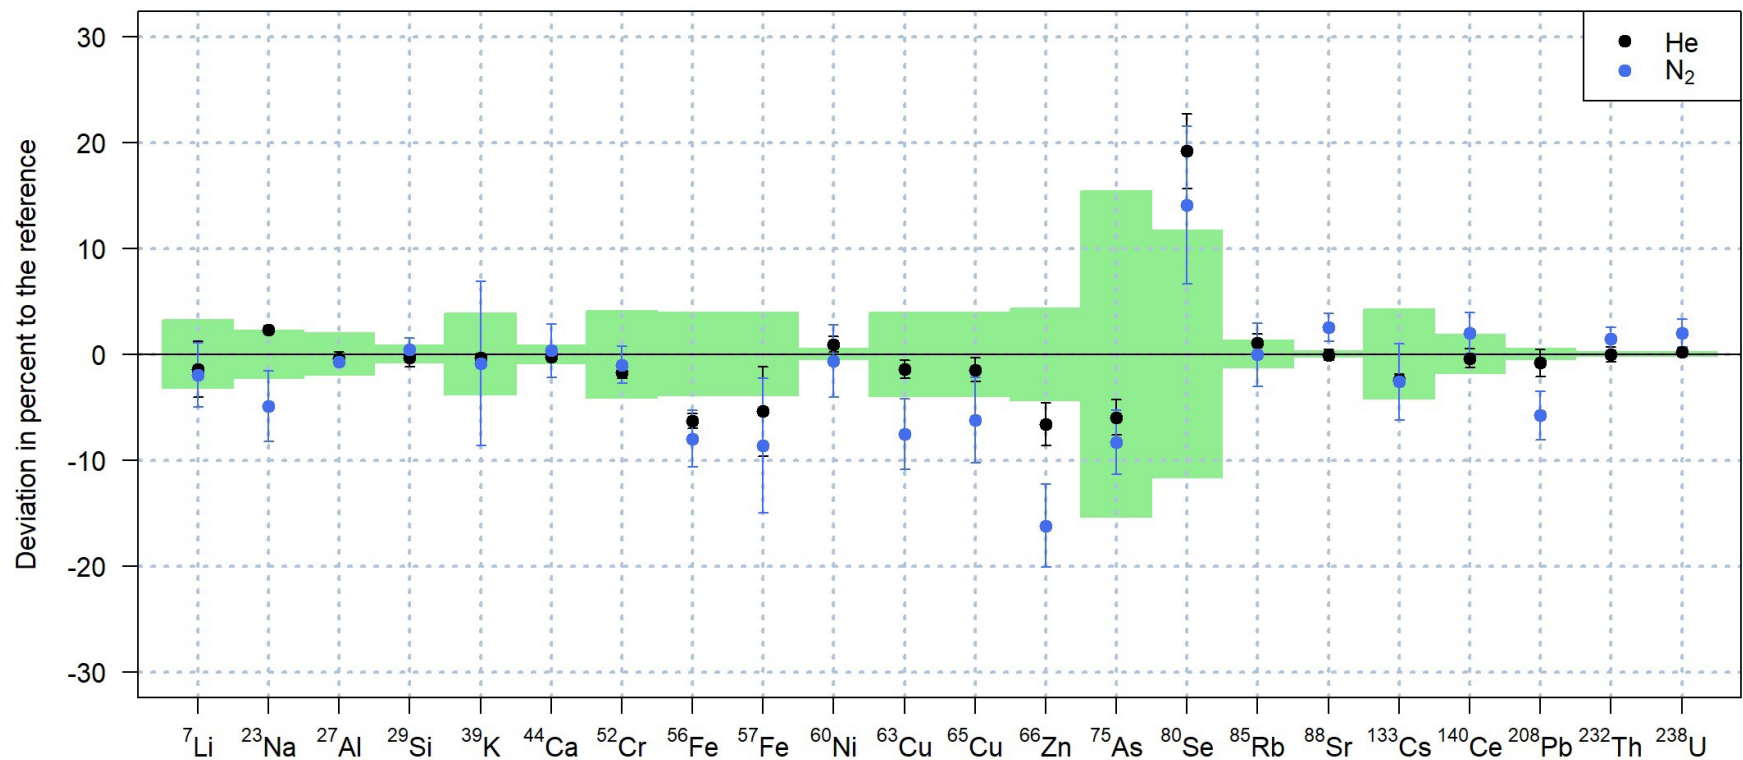

Supplement: d4ja00327f6.pdf [file d4ja00327f6.pdf]

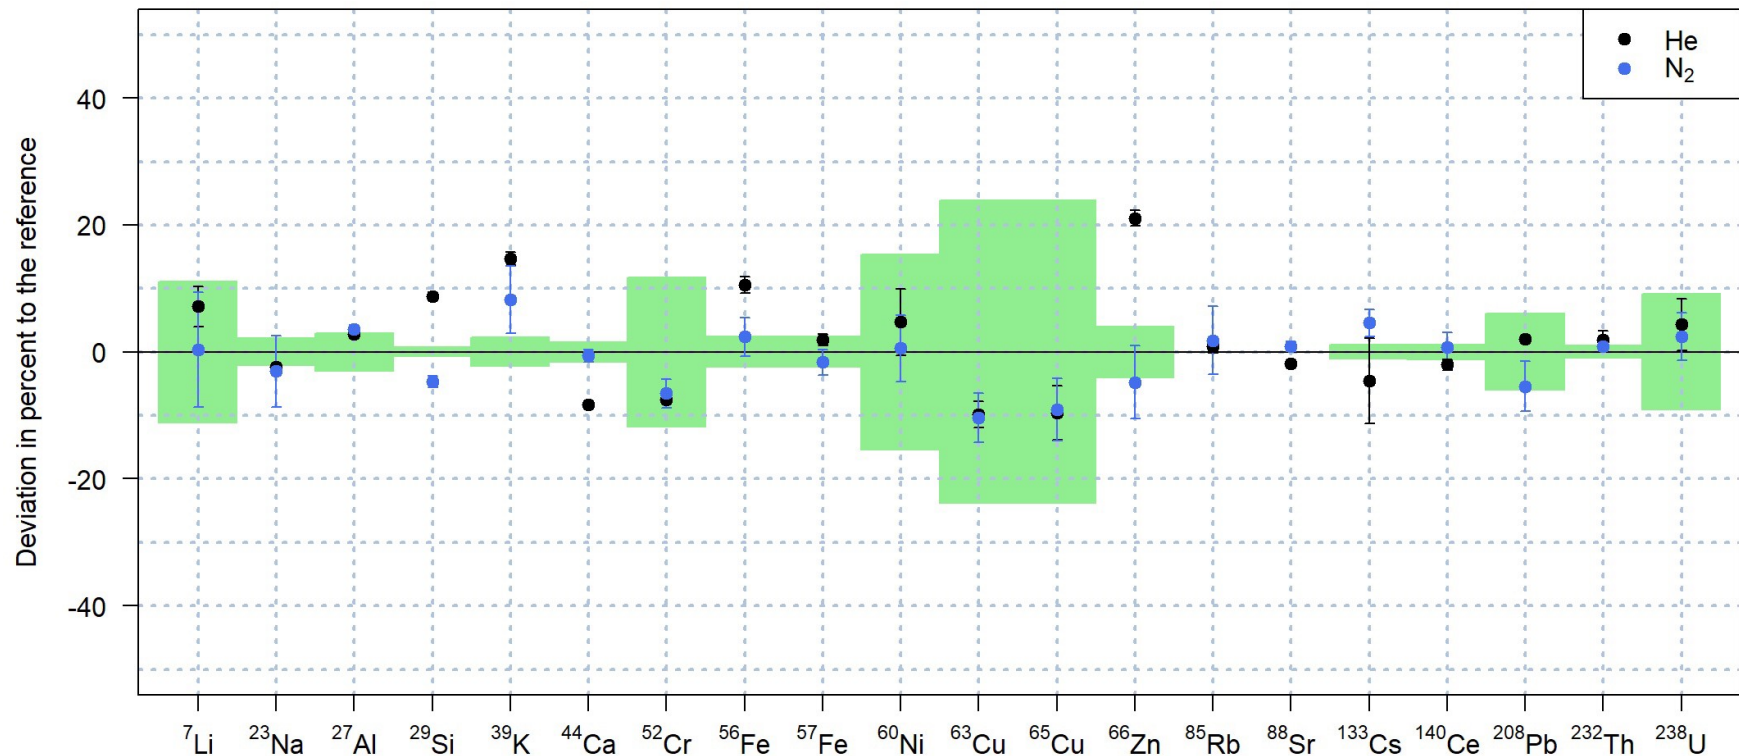

Supplement: d4ja00327f7.pdf [file d4ja00327f7.pdf]

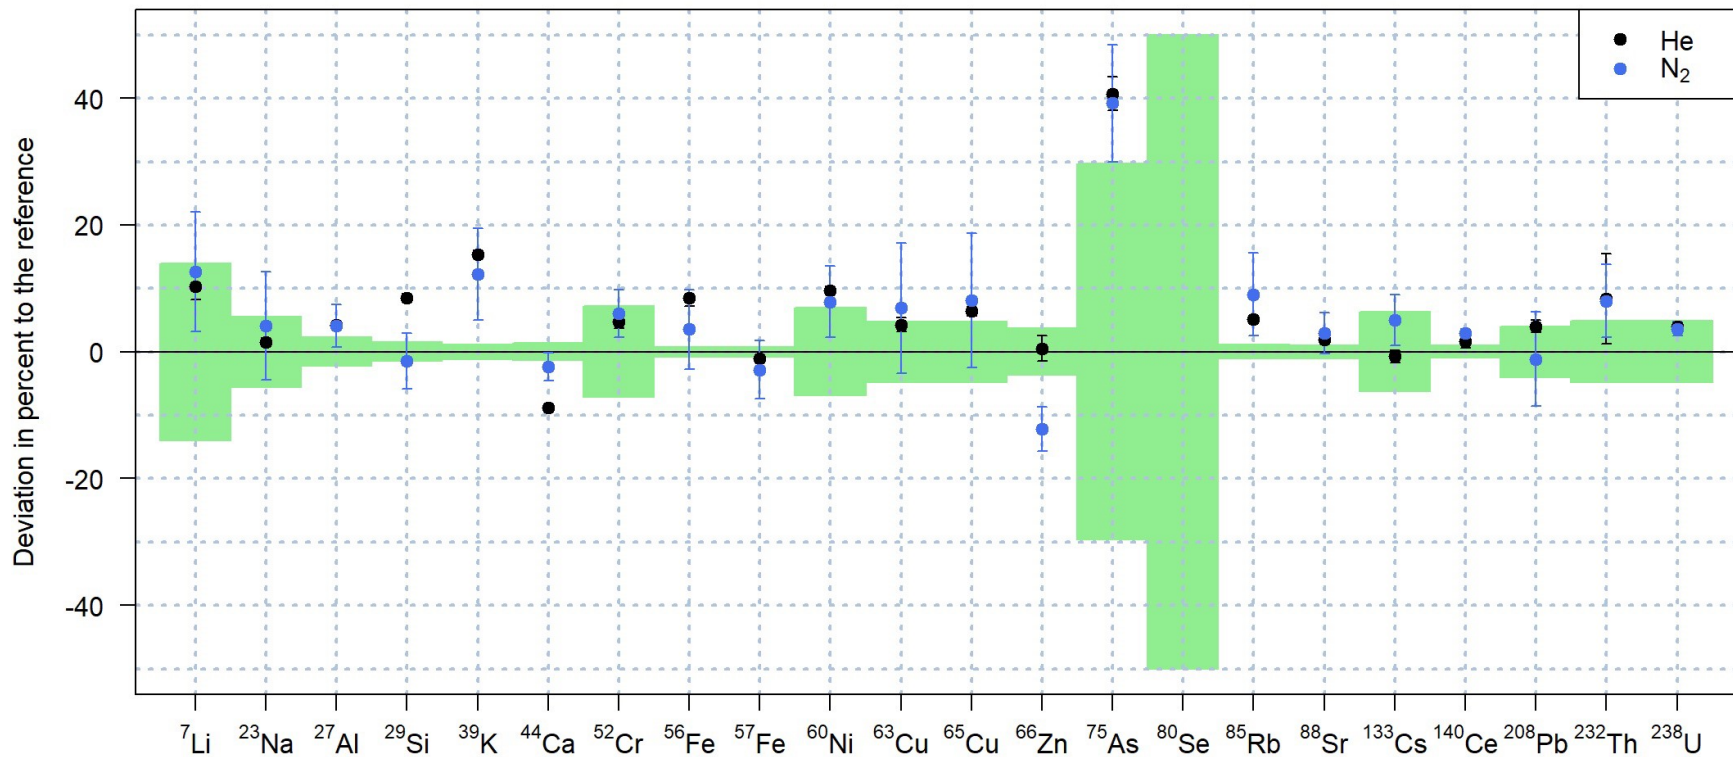

Supplement: d4ja00327f8.pdf [file d4ja00327f8.pdf]

**a)**

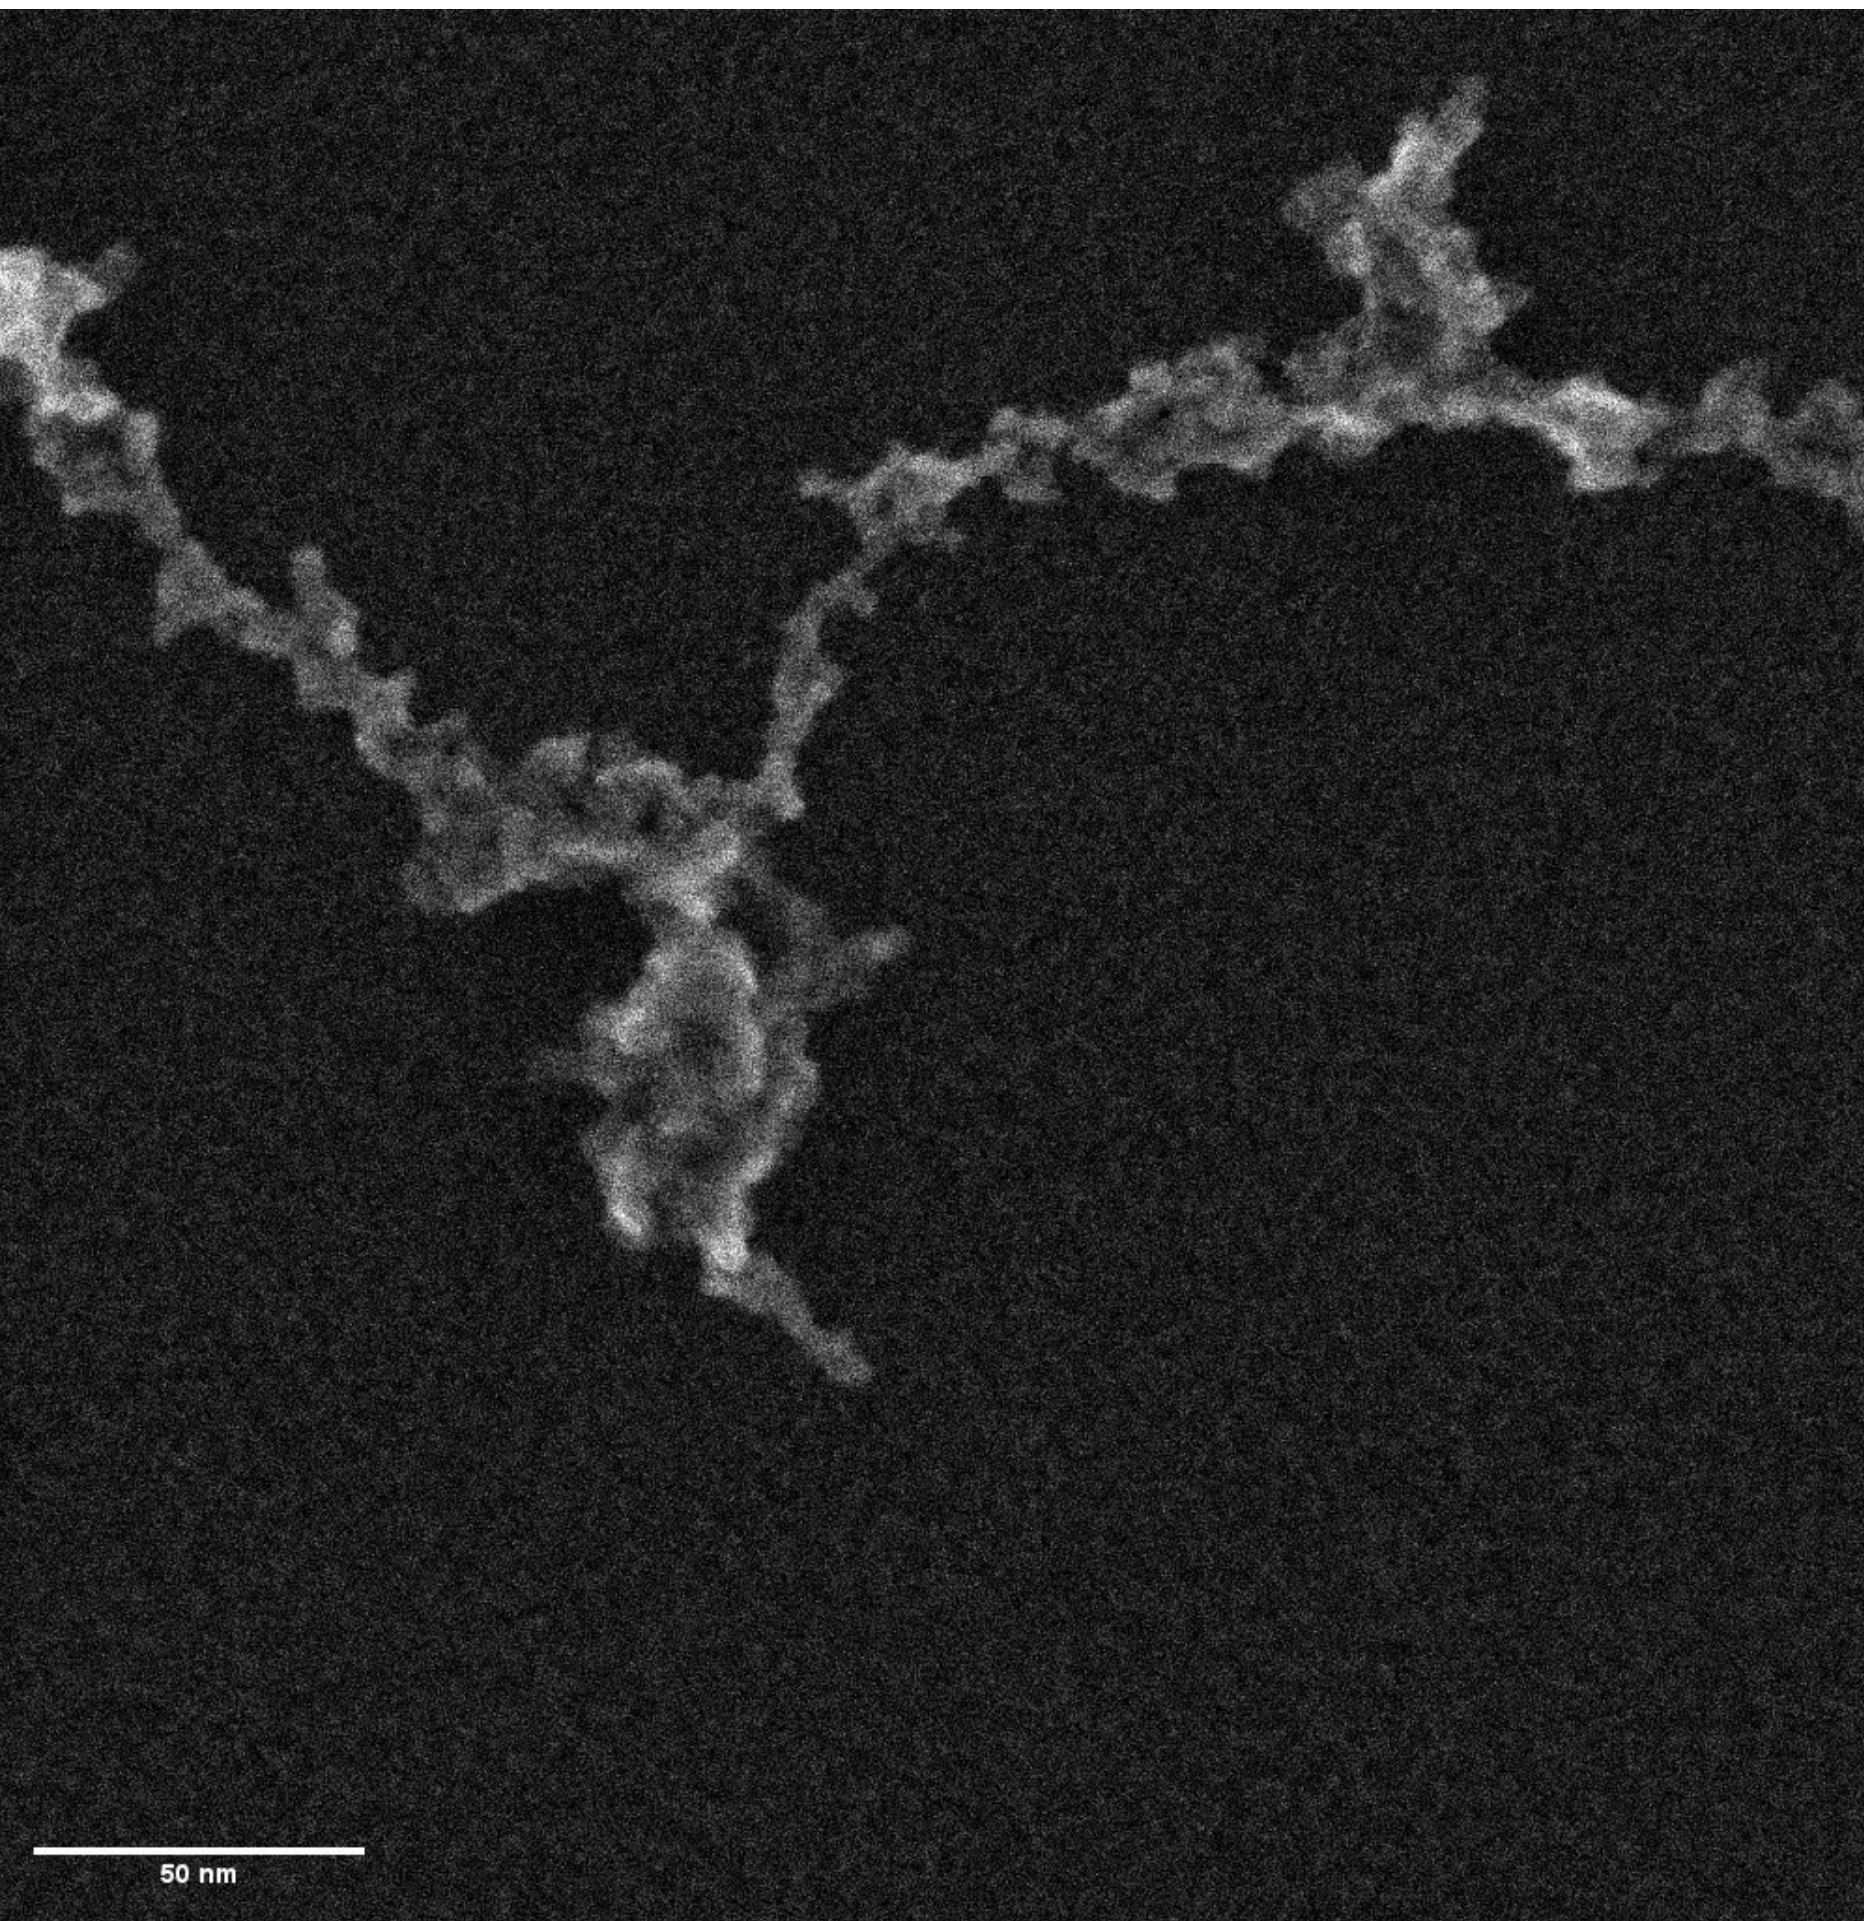

**b)**

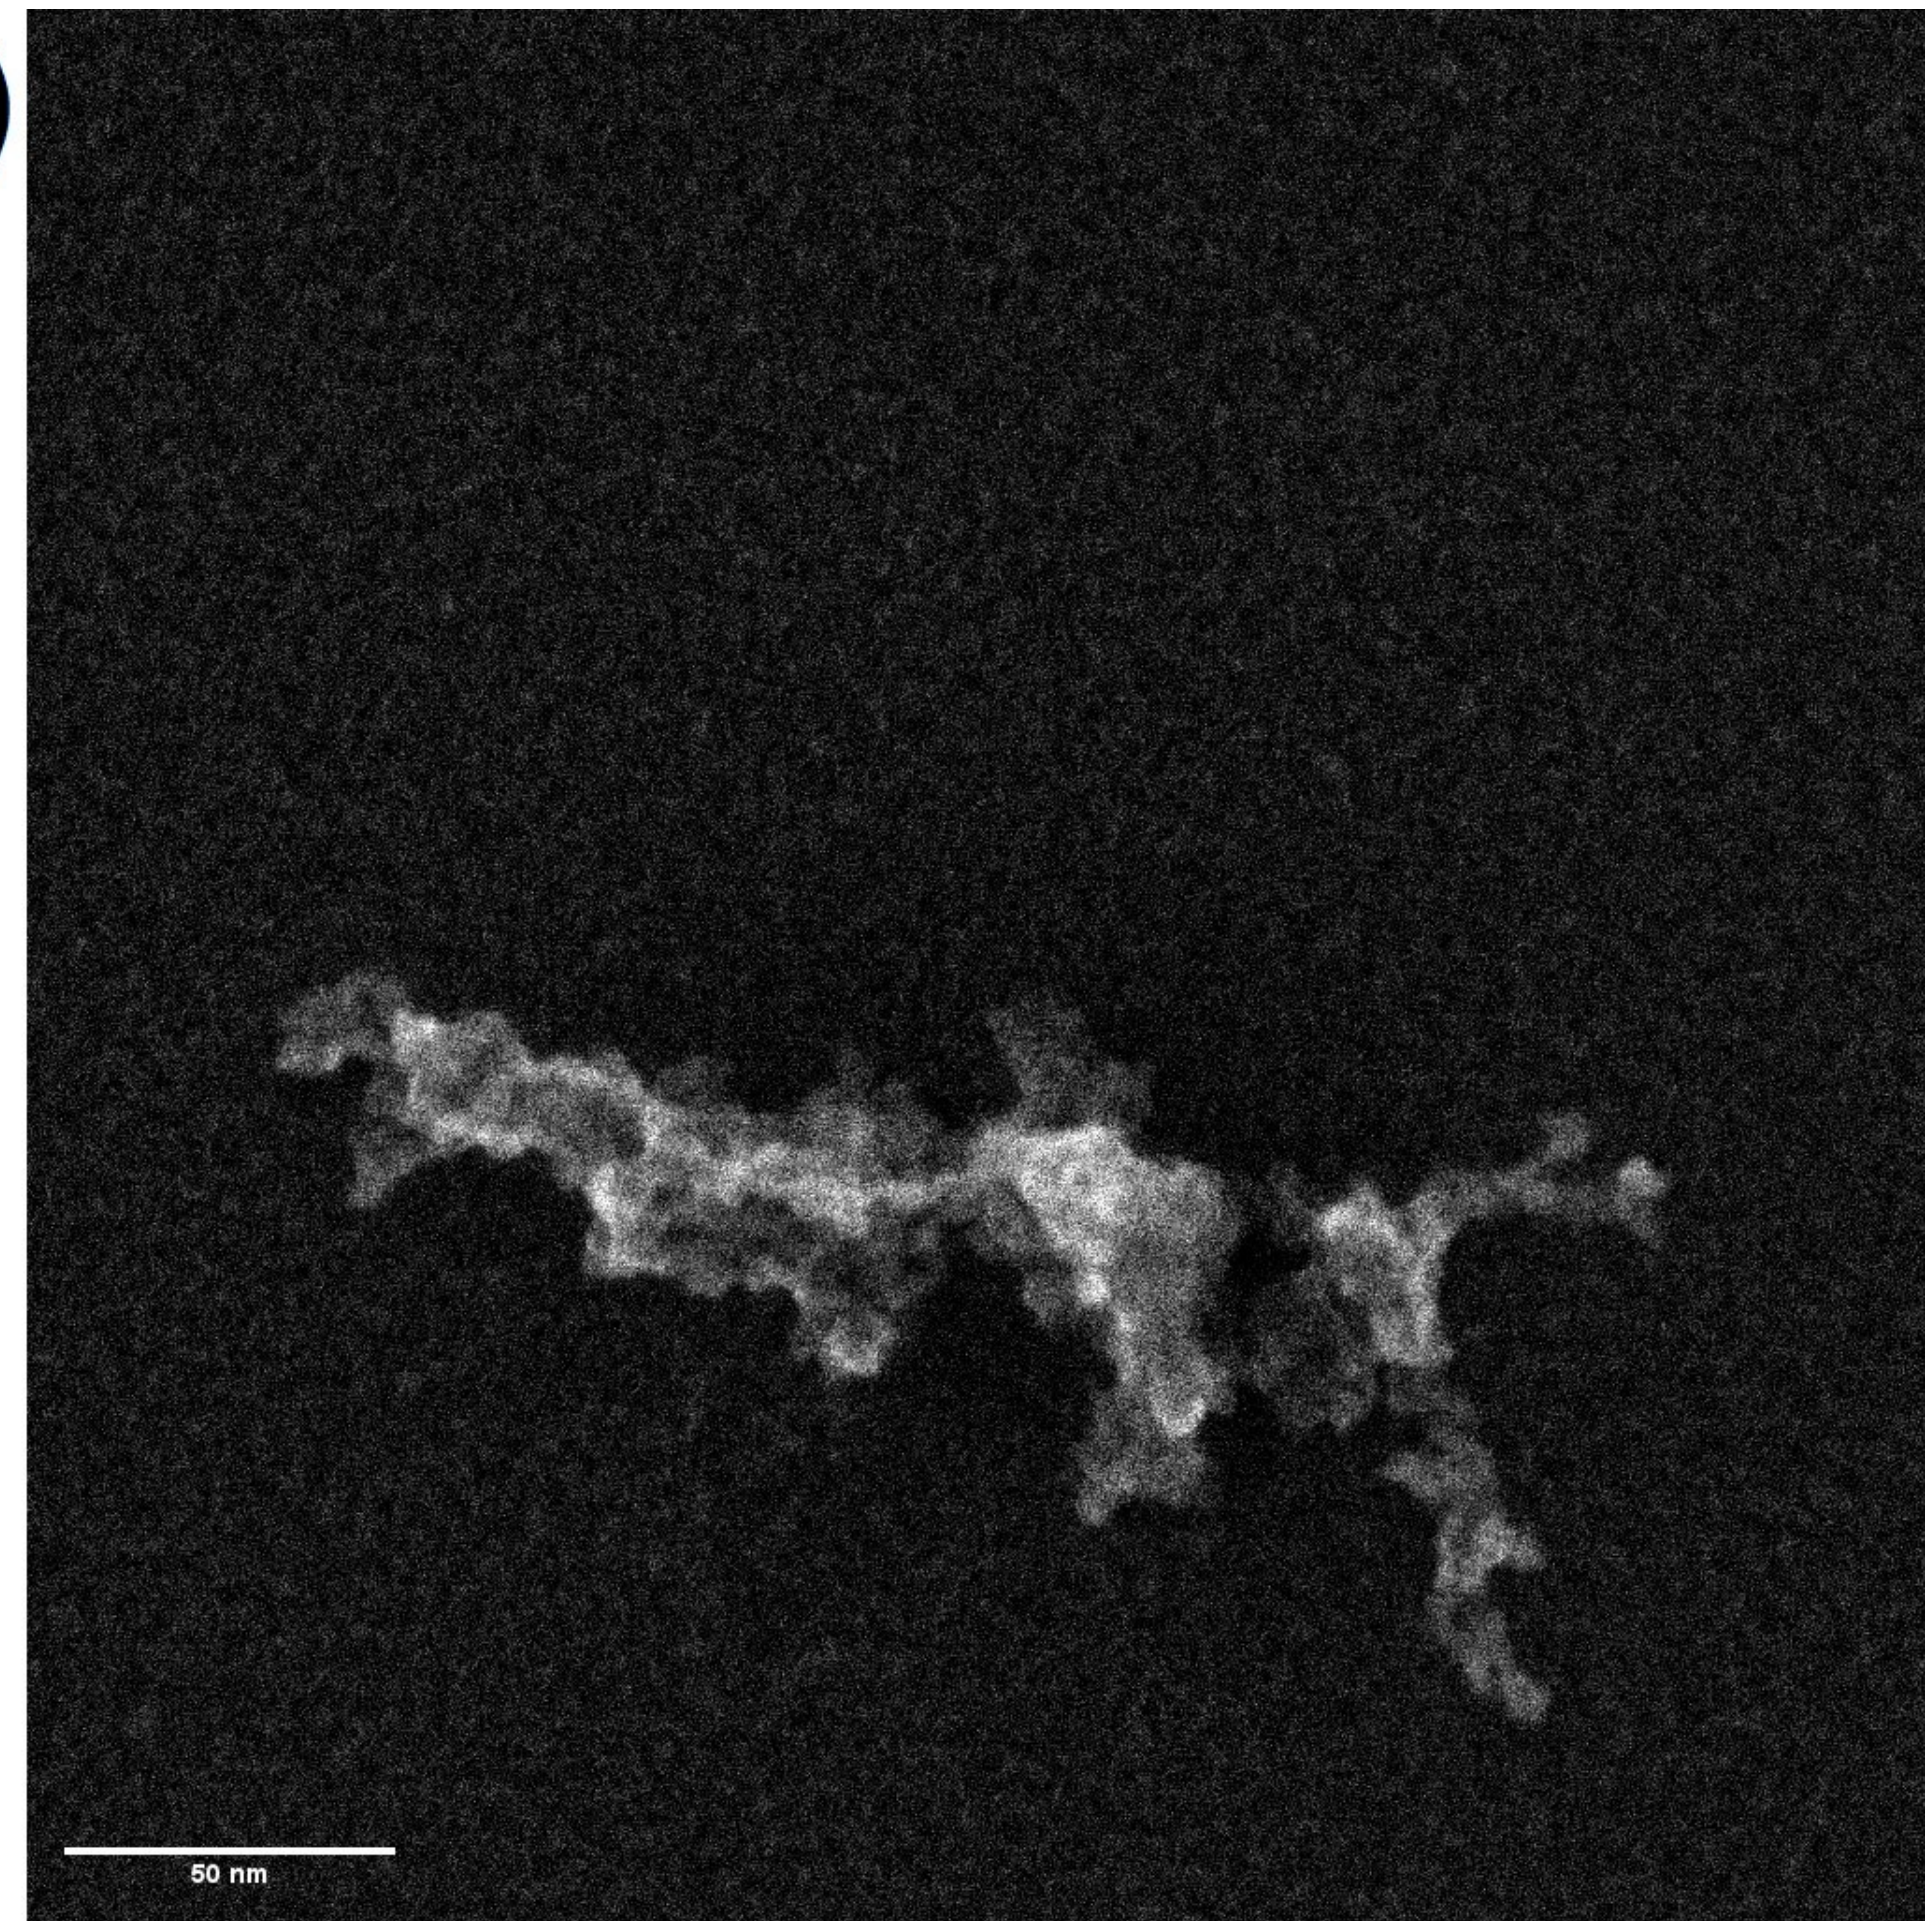

**c)**

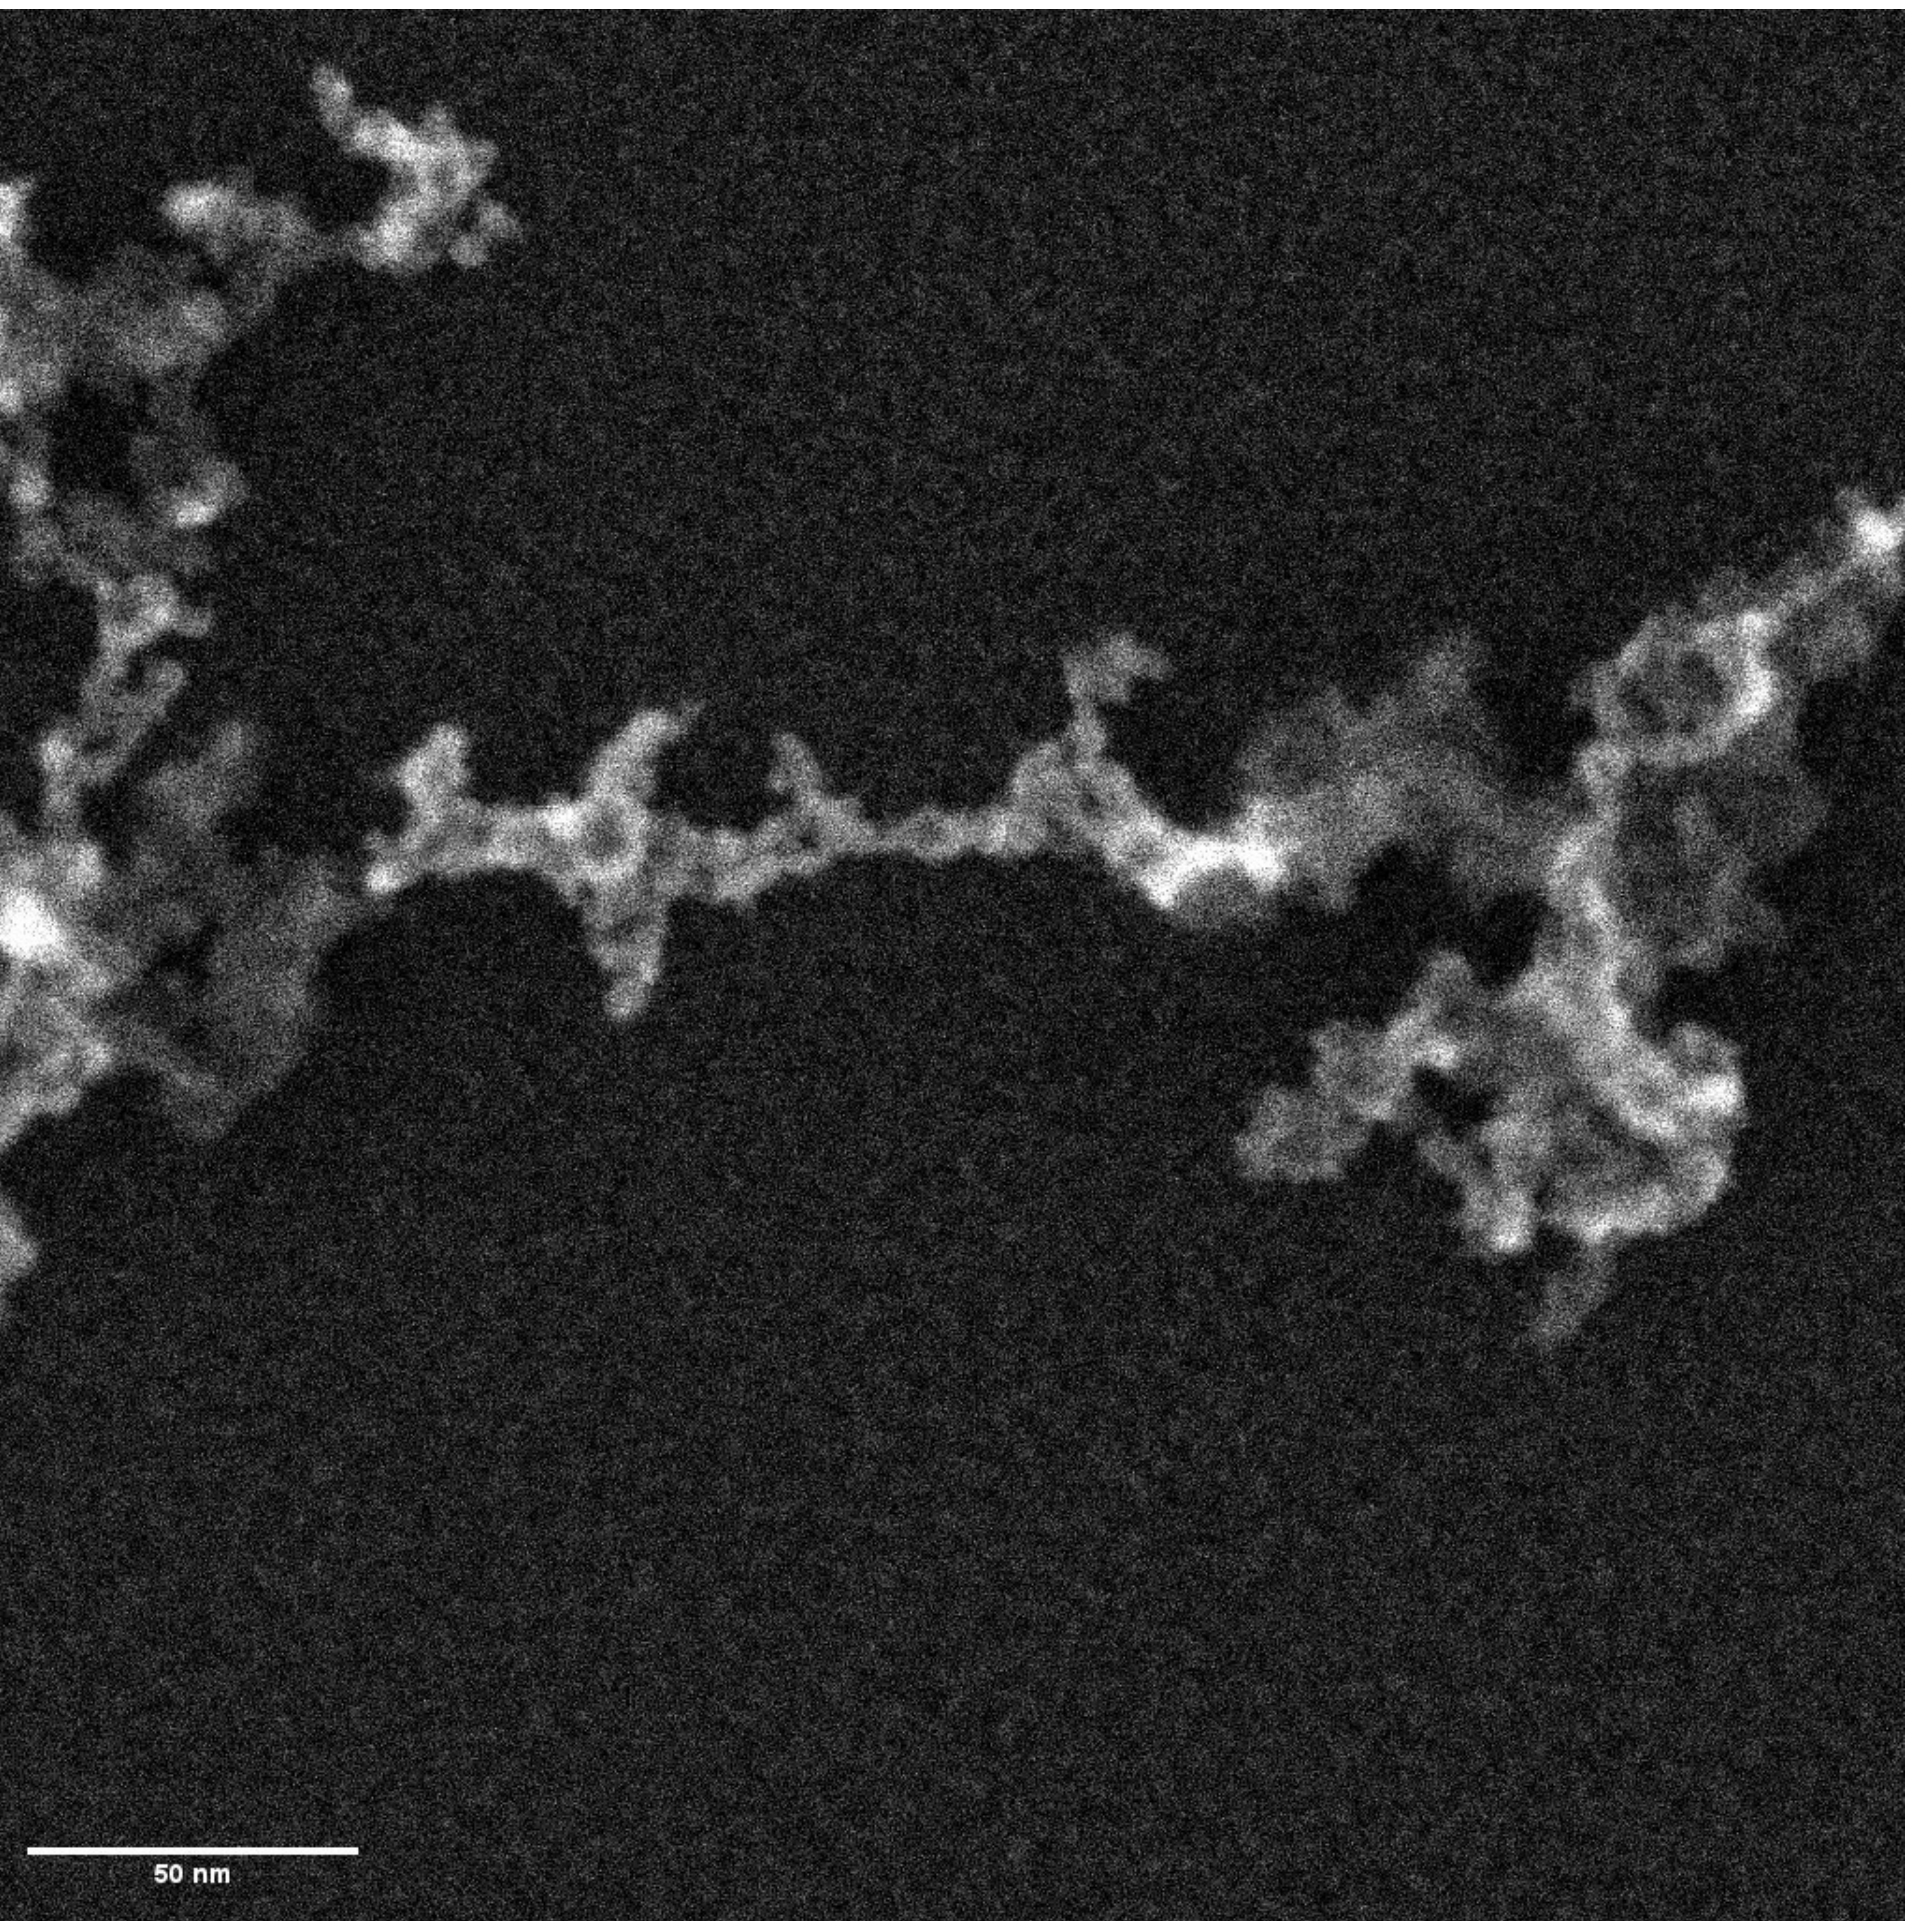

Supplement: d4ja00327f9.pdf [file d4ja00327f9.pdf]
